# Supplementary material for: Gain, Loss and Divergence in Primate Zinc-Finger Genes: A Rich Resource for Evolution of Gene Regulatory Differences between Species
Source: PLoS One. 2011 Jun 29;6(6):e21553. doi: 10.1371/journal.pone.0021553 (PMC3126818; doi:10.1371/journal.pone.0021553)
Supplement: Table S1 — Ten genes that were not assigned official gene symbols by the Human Genome Organization (HUGO) before publication of this manuscript. (XLSX) [file pone.0021553.s004.xlsx]

## Sheet: Table S1
Table S1: Ten genes that were not assigned official gene symbols by the Human Genome Organization (HUGO) before publication of this manuscript
ID in Huntley et al. 2005)	HUGO symbol
LLNL1100	ZNF775B
LLNL423	ZNF929
LLNL653	ZNF587B
LLNL679	ZNF658C
LLNL739	ZNF895
LLNL755	ZNF894
LLNL758	ZNF893
LLNL760	ZNF858
LLNL889	ZNF889
LLNL892	ZNF892
