# Supplementary material for: Gain, Loss and Divergence in Primate Zinc-Finger Genes: A Rich Resource for Evolution of Gene Regulatory Differences between Species
Source: PLoS One. 2011 Jun 29;6(6):e21553. doi: 10.1371/journal.pone.0021553 (PMC3126818; doi:10.1371/journal.pone.0021553)
Supplement: Table S2 — Pair wise number of high-confidence and all-inclusive orthologous loci and number of orthologous loci in hominids and all four primates. (XLSX) [file pone.0021553.s005.xlsx]

## Sheet: Table S2
Table S2. Pair wise number of high-confidence and all-inclusive orthologous loci and number of orthologous loci in hominids and all four primates.
	High-confidence ortholog set			All-inclusive ortholog set
Lineage	C	O	R	C	O	R
H	663	515	487	769	767	694
C		435	421		728	656
O			399			731
HCO	435			700
HCOR	355			616
